# Supplementary material for: A Veritable Menagerie of Heritable Bacteria from Ants, Butterflies, and Beyond: Broad Molecular Surveys and a Systematic Review
Source: PLoS One. 2012 Dec 20;7(12):e51027. doi: 10.1371/journal.pone.0051027 (PMC3527441; doi:10.1371/journal.pone.0051027)
Supplement: Table S4 — Intraspecific screening performed for this study. Numbers of infected individual ants out of the total number with unambiguous screening results are indicated for three symbionts for which intraspecific screening was carried out. See Excel file. (XLSX) [file pone.0051027.s010.xlsx]

## Sheet: Sheet1
Wolbachia
Common name	Host genus	Host species	Fraction of infected colonies	Fraction of infected workers	Fraction of infected larvae	Fraction of infected pupae	Fraction of infected eggs	Fraction of infected males
ant	Labidus	coecus	0/2	0/2
ant	Labidus	praedator	0/3	0/3
ant	Neivamyrmex	pilosus	1/2	1/2
ant	Neivamyrmex	carolinensis	2/2	2/2
ant	Aenictus	laeviceps	5/5	5/5
ant	Aenictus	gracilis	2/2	2/2
ant	Aenictus	cornutus	4/4	4/4
ant	Dorylus	molestus	0/13	0/44	0/36	0/37
ant	Eciton	vagans	0/2	0/6	0/5
ant	Eciton	burchellii	0/6	0/22	0/27	0/4	0/14	0/2
ant	Nomamyrmex	esenbecki	0/5	0/3				0/2
ant	Polyrhachis	australis	0/3	0/3
ant	Polyrhachis	monteithi	0/3	0/3
ant	Polyrhachis	robsoni	0/7	0/7
ant	Polyrhachis	senilis	0/9	0/9
ant	Polyrhachis	trapezoidea	0/2	0/2
ant	Polyrhachis	flavibasis	5/5	5/5
ant	Polyrhachis	rufifemur	3/3	3/3
Arsenophonus
Common name	Host genus	Host species	Fraction of infected colonies	Fraction of infected workers	Fraction of infected larvae	Fraction of infected pupae	Fraction of infected eggs	Fraction of infected males
ant	Labidus	praedator	0/3	0/3
ant	Labidus	spec. (praedator or coecus)	1/2					1/2
ant	Neivamyrmex	pilosus	0/2	0/2
ant	Neivamyrmex	carolinensis	0/2	0/2
ant	Aenictus	laeviceps	0/5	0/5
ant	Aenictus	gracilis	0/2	0/2
ant	Aenictus	cornutus	0/4	0/4
ant	Dorylus	molestus	0/16	0/16
ant	Eciton	vagans	0/2	0/2
ant	Eciton	burchellii	1/7	1/7
ant	Neivamyrmex	nigrescens	0/6	0/6
ant	Nomamyrmex	esenbecki	1/6	0/4				1/2
Spiroplasma
Common name	Host genus	Host species	Fraction of infected colonies	Fraction of infected workers	Fraction of infected larvae	Fraction of infected pupae	Fraction of infected eggs	Fraction of infected males
ant	Polyrhachis	australis	0/3	0/3
ant	Polyrhachis	monteithi	0/3	0/3
ant	Polyrhachis	robsoni	1/7	1/7
ant	Polyrhachis	senilis	0/9	0/9
ant	Polyrhachis	trapezoidea	0/2	0/2
ant	Polyrhachis	ammon	0/2	0/2
ant	Polyrhachis	flavibasis	0/5	0/5
ant	Polyrhachis	rufifemur	0/3	0/3
